# Supplementary material for: Comparative effectiveness of combined antiplatelet treatments in acute minor ischaemic stroke
Source: HighWire-hosted journal article supplement (doi:10.1136/svn-2020-000841), 2021-07-20
Supplement: svn-2020-000841supp001_data_supplement.pdf [file svn-2020-000841supp001_data_supplement.pdf]

## ONLINE SUPPLEMENTS

Title: Comparative effectiveness of combined antiplatelet treatments in acute minor ischemic stroke

Supplemental Methods

Supplemental Figure 2

Supplemental Tables 1-10

## Supplemental Methods

### (A) Statistical analysis

Frequencies (percentages), means (SDs), and medians (interquartile ranges, IQRs) were reported depending on the variable type. Categorical variables were analyzed using Pearson's chi-squared test or Fisher's exact test, and continuous variables were analyzed using Student's t-test or the Wilcoxon rank-sum test, as appropriate. The following parameters had missing data that were substituted using median values: white blood cell count (0.1%), creatinine (1.0% of the data were missing), initial random glucose (0.7%), hemoglobin (0.1%), platelet count (0.2%), and first fasting LDL cholesterol (3.1%).

To minimize confounding and residual selection bias in observational treatment comparisons, a propensity score weighting method was applied to control for imbalances in various baseline characteristics across the three groups. In this study, a generalized propensity score was applied using multinomial logistic regression, and the corresponding inverse probabilities of treatment weights (the reciprocals of the propensity scores) were estimated.

To evaluate the effects of clopidogrel-aspirin or aspirin alone compared with other combination treatments and other covariates on various outcomes, hazard ratios (HRs) and their 95% confidence intervals (CIs) were estimated using weighted Cox proportional hazards regression models with inverse probability of treatment weighting (IPTW) and robust standard errors. The event rates of the primary and secondary outcome measures were estimated using adjusted Kaplan-Meier estimates and compared using the IPTW log-rank test.<sup>5</sup>

Supplemental analyses were performed using Cox proportional hazard models with adjustment for variables that were predetermined based on their influence on the outcomes and treatment groups (i.e., age; male sex; initial NIHSS score; arrival time; TOAST classification; TIA history, stroke, CAD, or PAD; HTN; DM; dyslipidemia; smoking; atrial fibrillation; prior antiplatelet, antihypertensive, antidiabetic, statin, or lipid-lowering agent use; multiple lesions; LASO; discharge medications including antihypertensives, antidiabetics, statins, and lipid-lowering agents; creatinine; hemoglobin; platelet count; LDL-C; glucose; and SBP).

Supplemental Figure 1. Selection of the study population

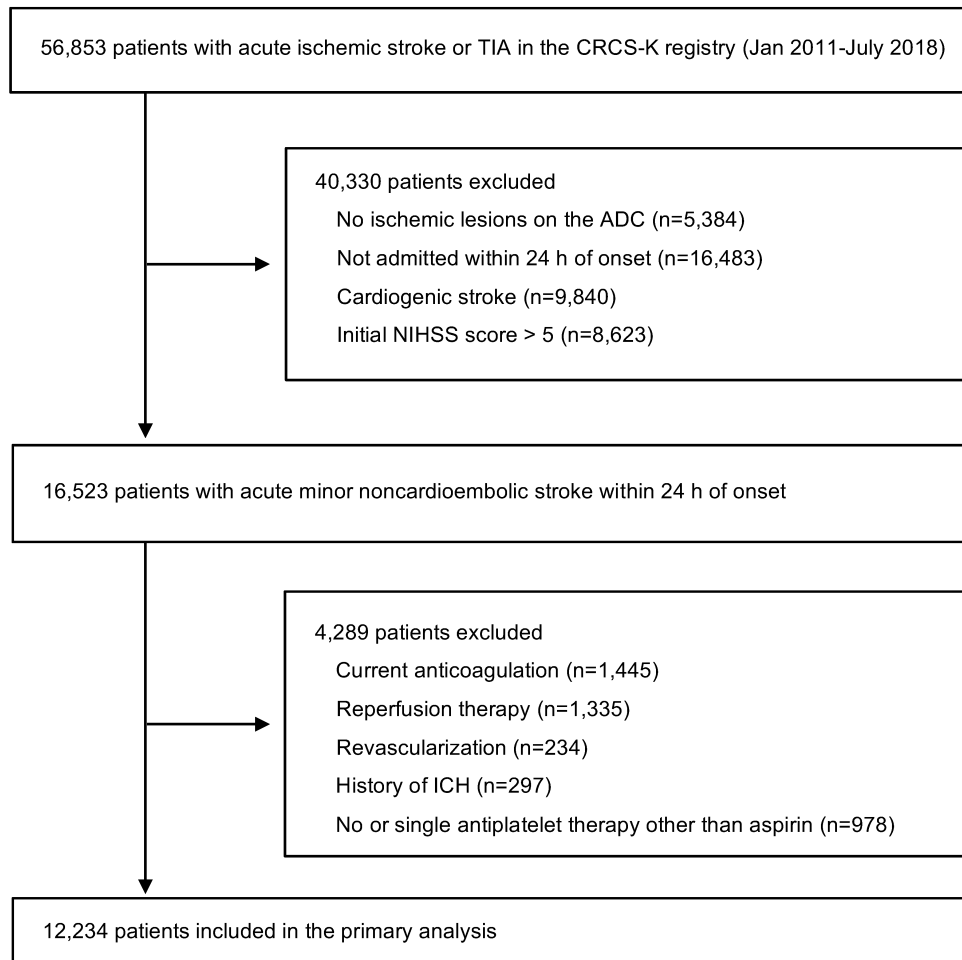

Supplemental Figure 2. Weighted Kaplan-Meier incidence plots for all-cause mortality (a) and MI (b) in patients treated with other combined antiplatelets, clopidogrel-aspirin, and aspirin monotherapy.

a) All-cause mortality

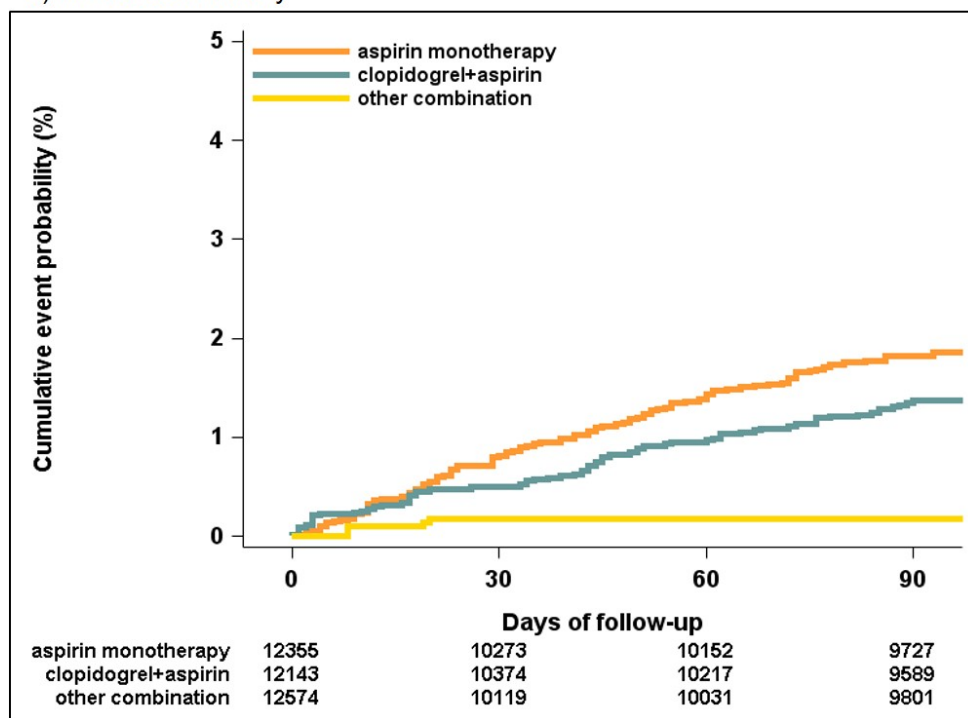

b) MI

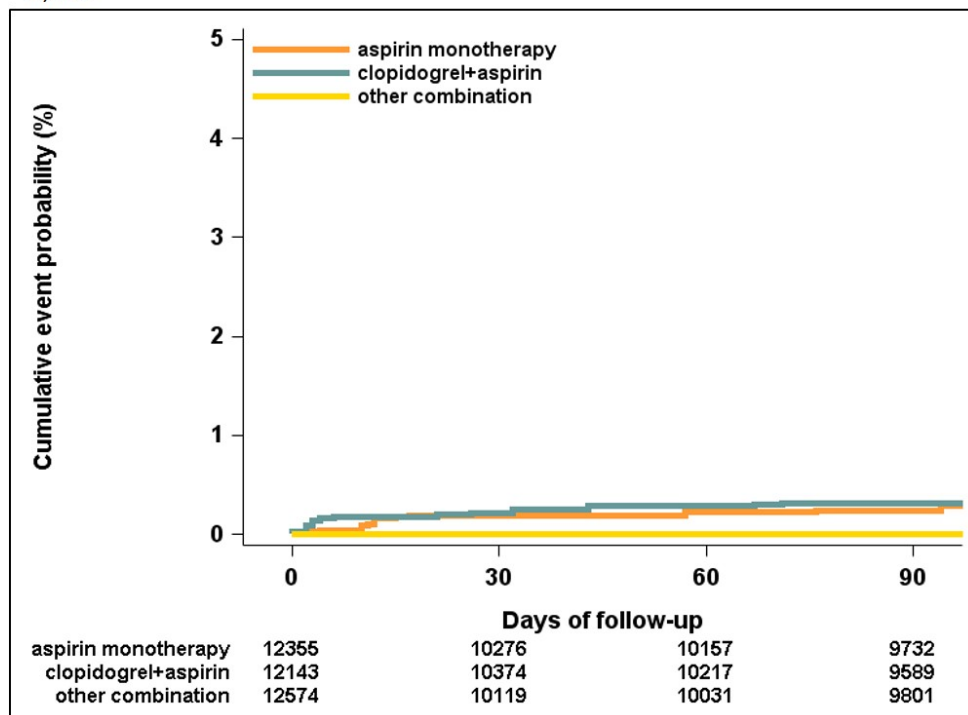

Supplemental Table 1. Detailed antiplatelet regimens (A) and protocols (B)

## (A) Detailed antiplatelet regimens

|                                    | N     | %    | % within groups |
|------------------------------------|-------|------|-----------------|
| Aspirin monotherapy                | 6391  | 52.2 |                 |
| Clopidogrel + Aspirin              | 5243  | 42.9 |                 |
| Other combined treatment           | 600   | 4.9  |                 |
| Cilostazol + Aspirin               | 403   | 3.3  | 67.2            |
| Cilostazol + Clopidogrel           | 51    | 0.4  | 8.5             |
| Cilostazol + Ticlopidine           | 1     | 0.0  | 0.2             |
| Cilostazol + Triflusal             | 1     | 0.0  | 0.2             |
| Ticlopidine + Aspirin              | 36    | 0.3  | 6.0             |
| Ticlopidine + Triflusal            | 1     | 0.0  | 0.2             |
| Triflusal + Aspirin                | 5     | 0.0  | 0.8             |
| Triflusal + Clopidogrel            | 5     | 0.0  | 0.8             |
| Triple or more combination         | 97    | 0.8  | 16.2            |
| Cilostazol + Aspirin + Clopidogrel | 91    |      |                 |
| Ticlopidine+ Aspirin + Clopidogrel | 4     |      |                 |
| Triflusal + Aspirin + Clopidogrel  | 2     |      |                 |
| Total                              | 12234 |      |                 |

## (B) Antiplatelet protocols

| Antiplatelet regimens | Loading dose | Maintain dose | Duration         |
|-----------------------|--------------|---------------|------------------|
| Aspirin               | 100-300mg    | 100mg         |                  |
| Clopidogrel           | 75-300mg     | 75mg          |                  |
| Cilostazol            | 100-200mg    | 50-200mg      |                  |
| Triflusal             | 600-900mg    | 600-900mg     |                  |
| Ticlopidine           | 200-500mg    | 200-500mg     |                  |
| Clopidogrel + Aspirin |              |               | within 3 months* |
| Other combination     |              |               | within 3 months* |

\*Some patients are allowed to 3 months or more (up to 1 year).

Supplemental Table 2. Propensity score analysis

|                                | Aspirin monotherapy | Clopidogrel-aspirin | Other combination | ASD1  | ASD2  |
|--------------------------------|---------------------|---------------------|-------------------|-------|-------|
| N                              | 12355               | 12143               | 12574             |       |       |
| Age (yrs.), mean (SD)          | 65.7 (18.1)         | 65.7 (19.4)         | 66.7 (56.0)       | 0.025 | 0.024 |
| Male, n (%)                    | 7623 (61.7)         | 7511 (61.9)         | 7750 (61.6)       | 0.001 | 0.004 |
| Onset-to-admission time        |                     |                     |                   | 0.005 | 0.005 |
| Within 12 h                    | 9204 (74.5)         | 9049 (74.5)         | 9396 (74.7)       |       |       |
| 12 h-24 h                      | 3151 (25.5)         | 3093 (25.5)         | 3178 (25.3)       |       |       |
| Body mass index, mean (SD)     | 24.0 (4.5)          | 23.9 (5.0)          | 23.9 (15.1)       | 0.008 | 0.006 |
| NIHSS score, median (IQR)      | 2 (1 - 3)           | 2 (1 - 3)           | 2 (1 - 3)         | 0.005 | 0.006 |
| TOAST                          |                     |                     |                   | 0.093 | 0.075 |
| LAA                            | 5338 (43.2)         | 5244 (43.2)         | 5398 (42.9)       |       |       |
| SVO                            | 3889 (31.5)         | 3831 (31.5)         | 4238 (33.7)       |       |       |
| OE                             | 406 (3.3)           | 411 (3.4)           | 302 (2.4)         |       |       |
| UD                             | 2722 (22.0)         | 2657 (21.9)         | 2636 (21.0)       |       |       |
| History of TIA                 | 309 (2.5)           | 291 (2.4)           | 289 (2.3)         | 0.013 | 0.006 |
| History of stroke              | 1979 (16.0)         | 1941 (16.0)         | 1779 (14.1)       | 0.052 | 0.051 |
| History of PAD                 | 59 (0.5)            | 46 (0.4)            | 40 (0.3)          | 0.025 | 0.010 |
| History of CAD                 | 873 (7.1)           | 825 (6.8)           | 705 (5.6)         | 0.060 | 0.049 |
| Hypertension                   | 8053 (65.2)         | 7880 (64.9)         | 8494 (67.5)       | 0.050 | 0.056 |
| Diabetes mellitus              | 4023 (32.6)         | 3946 (32.5)         | 3866 (30.7)       | 0.039 | 0.038 |
| Dyslipidemia                   | 3788 (30.7)         | 3821 (31.5)         | 3670 (29.2)       | 0.032 | 0.050 |
| Smoking status                 |                     |                     |                   | 0.070 | 0.101 |
| Never smoker                   | 7226 (58.5)         | 7061 (58.1)         | 7295 (58.0)       |       |       |
| Ex-smoker, >5 yrs.             | 1021 (8.3)          | 1034 (8.5)          | 937 (7.5)         |       |       |
| Recent smoker, within 5 yrs.   | 617 (5.0)           | 620 (5.1)           | 504 (4.0)         |       |       |
| Current smoker                 | 3490 (28.2)         | 3427 (28.2)         | 3838 (30.5)       |       |       |
| Atrial fibrillation            | 91 (0.7)            | 69 (0.6)            | 56 (0.4)          | 0.038 | 0.017 |
| Prior antiplatelet use         | 3126 (25.3)         | 3008 (24.8)         | 2897 (23.0)       | 0.053 | 0.041 |
| Prior antihypertensive use     | 5854 (47.4)         | 5728 (47.2)         | 6025 (47.9)       | 0.011 | 0.015 |
| Prior statin use               | 2181 (17.7)         | 2156 (17.8)         | 1957 (15.6)       | 0.056 | 0.059 |
| Prior lipid-lowering agent use | 257 (2.1)           | 242 (2.0)           | 199 (1.6)         | 0.037 | 0.031 |
| Prior antidiabetic use         | 2976 (24.1)         | 2915 (24.0)         | 2822 (22.4)       | 0.039 | 0.037 |
| Multiple lesions               | 1357 (11.0)         | 1293 (10.6)         | 1271 (10.1)       | 0.029 | 0.018 |
| LASO                           |                     |                     |                   | 0.030 | 0.000 |
| No stenosis                    | 7094 (57.4)         | 7001 (57.7)         | 7302 (58.1)       |       |       |
| Mild (<50%)                    | 1249 (10.1)         | 1215 (10.0)         | 1308 (10.4)       |       |       |
| Significant (≥50%)             | 2385 (19.3)         | 2361 (19.4)         | 2406 (19.1)       |       |       |
| Occlusion                      | 1627 (13.2)         | 1565 (12.9)         | 1559 (12.4)       |       |       |
| In-hospital treatment          |                     |                     |                   |       |       |
| Antidiabetics                  | 3034 (24.6)         | 2978 (24.5)         | 3243 (25.8)       | 0.029 | 0.029 |
| Antihypertensives              | 5276 (42.7)         | 5144 (42.4)         | 5678 (45.2)       | 0.049 | 0.056 |
| Anti-lipid lowering agents     | 7768 (62.9)         | 7634 (62.9)         | 7812 (62.1)       | 0.015 | 0.015 |
| Statins                        | 11332 (91.7)        | 11161 (91.9)        | 11482 (91.3)      | 0.014 | 0.022 |
| Laboratory findings, mean (SD) |                     |                     |                   |       |       |
| WBC count                      | 8.0 (3.9)           | 8.0 (4.3)           | 7.9 (13.2)        | 0.010 | 0.009 |
| Creatinine                     | 1.02 (1.62)         | 1.00 (1.30)         | 0.99 (4.06)       | 0.011 | 0.003 |
| Hemoglobin                     | 13.8 (2.7)          | 13.8 (2.8)          | 13.8 (8.1)        | 0.001 | 0.002 |
| Platelet count                 | 235.2 (96.4)        | 235.0 (102.1)       | 234.5 (320.0)     | 0.003 | 0.002 |

|                         |              |              |               |       |       |
|-------------------------|--------------|--------------|---------------|-------|-------|
| LDL-cholesterol         | 111.1 (50.4) | 111.4 (56.3) | 112.9 (175.3) | 0.013 | 0.011 |
| Glucose                 | 144.6 (87.8) | 144.6 (94.4) | 142.2 (276.3) | 0.012 | 0.012 |
| Systolic blood pressure | 150.1 (38.6) | 150.5 (41.6) | 151.8 (128.7) | 0.018 | 0.014 |

ASD: absolute standardized difference.

\*An ASD >0.1 is considered a meaningful imbalance.

Supplemental Table 3. Crude event rates according to antiplatelet treatment

|                                                                        | aspirin monotherapy |                                             | clopidogrel-aspirin |                                             | other combination |                                             | P <sup>†</sup> | AM vs other     | C-A vs other    |
|------------------------------------------------------------------------|---------------------|---------------------------------------------|---------------------|---------------------------------------------|-------------------|---------------------------------------------|----------------|-----------------|-----------------|
|                                                                        | No. of events       | 3-month event rate (%; 95% CI) <sup>a</sup> | No. of events       | 3-month event rate (%; 95% CI) <sup>a</sup> | No. of events     | 3-month event rate (%; 95% CI) <sup>a</sup> |                | P1 <sup>‡</sup> | P2 <sup>‡</sup> |
| Primary outcome; composite of all strokes, MI, and all-cause mortality | 941                 | 14.71 (13.83-15.58)                         | 698                 | 13.39 (12.46-14.32)                         | 89                | 15.01 (12.13-17.89)                         | 0.082          | 0.295           | 0.066           |
| Secondary outcome                                                      |                     |                                             |                     |                                             |                   |                                             |                |                 |                 |
| All strokes                                                            | 875                 | 13.64 (12.80-14.49)                         | 651                 | 12.47 (11.57-13.37)                         | 87                | 14.67 (11.82-17.52)                         | 0.077          | 0.556           | 0.049           |
| All-cause mortality                                                    | 93                  | 1.67 (1.33-2.01)                            | 68                  | 1.50 (1.15-1.85)                            | 3                 | 0.60 (0.00-1.27)                            | 0.151          | 0.195           | 1.000           |
| MI                                                                     | 10                  | 0.16 (0.06-0.27)                            | 14                  | 0.30 (0.14-0.45)                            | 0                 | 0.00 (0.00-0.00)                            | 0.230          | 1.000           | 0.178           |

<sup>a</sup> Based on the Kaplan-Meier estimates.

<sup>†</sup> P-value by the log-rank test.

<sup>‡</sup> Adjusted P-value by the Bonferroni adjustment method.



Supplemental Table 4. Propensity score analysis of sensitivity analysis for the cilostazol-based combination

|                                | Before multiple treatment PS |                     |                              |       |       | After multiple treatment PS |                     |                              |       |       |
|--------------------------------|------------------------------|---------------------|------------------------------|-------|-------|-----------------------------|---------------------|------------------------------|-------|-------|
|                                | Aspirin monotherapy          | Clopidogrel-aspirin | Cilostazol-based combination | ASD1  | ASD2  | Aspirin monotherapy         | Clopidogrel-aspirin | Cilostazol-based combination | ASD1  | ASD2  |
| N                              | 6391                         | 5243                | 547                          |       |       | 12297                       | 12091               | 12570                        |       |       |
| Age (yrs.), mean (SD)          | 64.3 (13.4)                  | 66.7 (12.5)         | 67.9 (11.5)                  | 0.289 | 0.103 | 65.6 (18.1)                 | 65.6 (19.4)         | 66.7 (59.8)                  | 0.024 | 0.023 |
| Male, n (%)                    | 3938 (61.6)                  | 3281 (62.6)         | 315 (57.6)                   | 0.082 | 0.102 | 7585 (61.7)                 | 7477 (61.8)         | 7719 (61.4)                  | 0.006 | 0.009 |
| Onset-to-admission time        |                              |                     |                              | 0.037 | 0.002 |                             |                     |                              | 0.004 | 0.003 |
| Within 12 h                    | 4710 (73.7)                  | 3953 (75.4)         | 412 (75.3)                   |       |       | 9160 (74.5)                 | 9013 (74.5)         | 9386 (74.7)                  |       |       |
| 12 h-24 h                      | 1681 (26.3)                  | 1290 (24.6)         | 135 (24.7)                   |       |       | 3137 (25.5)                 | 3078 (25.5)         | 3184 (25.3)                  |       |       |
| Body mass index, mean (SD)     | 23.9 (3.3)                   | 23.9 (3.2)          | 24.1 (3.5)                   | 0.053 | 0.058 | 24.0 (4.5)                  | 23.9 (4.9)          | 23.8 (15.8)                  | 0.012 | 0.010 |
| NIHSS score, median (IQR)      | 2 (1 - 3)                    | 2 (1 - 4)           | 2 (1 - 3)                    | 0.137 | 0.026 | 2 (1 - 3)                   | 2 (1 - 3)           | 2 (1 - 3)                    | 0.005 | 0.006 |
| TOAST                          |                              |                     |                              | 0.316 | 0.053 |                             |                     |                              | 0.093 | 0.075 |
| LAA                            | 2332 (36.5)                  | 2605 (49.7)         | 277 (50.6)                   |       |       | 5313 (43.2)                 | 5225 (43.2)         | 5397 (42.9)                  |       |       |
| SVO                            | 2311 (36.2)                  | 1447 (27.6)         | 157 (28.7)                   |       |       | 3872 (31.5)                 | 3813 (31.5)         | 4308 (34.3)                  |       |       |
| OE                             | 204 (3.2)                    | 176 (3.4)           | 16 (2.9)                     |       |       | 406 (3.3)                   | 411 (3.4)           | 293 (2.3)                    |       |       |
| UD                             | 1544 (24.2)                  | 1015 (19.4)         | 97 (17.7)                    |       |       | 2706 (22.0)                 | 2642 (21.9)         | 2573 (20.5)                  |       |       |
| History of TIA                 | 94 (1.5)                     | 168 (3.2)           | 32 (5.9)                     | 0.235 | 0.128 | 307 (2.5)                   | 289 (2.4)           | 298 (2.4)                    | 0.008 | 0.001 |
| History of stroke              | 639 (10.0)                   | 1038 (19.8)         | 221 (40.4)                   | 0.748 | 0.461 | 1943 (15.8)                 | 1909 (15.8)         | 1723 (13.7)                  | 0.059 | 0.059 |
| History of PAD                 | 14 (0.2)                     | 27 (0.5)            | 6 (1.1)                      | 0.109 | 0.065 | 58 (0.5)                    | 46 (0.4)            | 39 (0.3)                     | 0.026 | 0.012 |
| History of CAD                 | 250 (3.9)                    | 490 (9.3)           | 78 (14.3)                    | 0.366 | 0.153 | 862 (7.0)                   | 819 (6.8)           | 712 (5.7)                    | 0.055 | 0.046 |
| Hypertension                   | 3865 (60.5)                  | 3603 (68.7)         | 410 (75.0)                   | 0.313 | 0.139 | 8007 (65.1)                 | 7837 (64.8)         | 8476 (67.4)                  | 0.049 | 0.055 |
| Diabetes mellitus              | 1870 (29.3)                  | 1786 (34.1)         | 253 (46.3)                   | 0.356 | 0.251 | 4006 (32.6)                 | 3928 (32.5)         | 3860 (30.7)                  | 0.040 | 0.038 |
| Dyslipidemia                   | 1761 (27.6)                  | 1820 (34.7)         | 225 (41.1)                   | 0.289 | 0.133 | 3770 (30.7)                 | 3801 (31.4)         | 3659 (29.1)                  | 0.034 | 0.051 |
| Smoking status                 |                              |                     |                              | 0.218 | 0.156 |                             |                     |                              | 0.051 | 0.069 |
| Never smoker                   | 3641 (57.0)                  | 3093 (59.0)         | 339 (62.0)                   |       |       | 7189 (58.5)                 | 7028 (58.1)         | 7255 (57.7)                  |       |       |
| Ex-smoker, >5 yrs.             | 504 (7.9)                    | 480 (9.2)           | 53 (9.7)                     |       |       | 1017 (8.3)                  | 1029 (8.5)          | 956 (7.6)                    |       |       |
| Recent smoker, within 5 yrs.   | 321 (5.0)                    | 252 (4.8)           | 40 (7.3)                     |       |       | 617 (5.0)                   | 619 (5.1)           | 520 (4.1)                    |       |       |
| Current smoker                 | 1925 (30.1)                  | 1418 (27.0)         | 115 (21.0)                   |       |       | 3474 (28.3)                 | 3415 (28.2)         | 3839 (30.5)                  |       |       |
| Atrial fibrillation            | 41 (0.6)                     | 25 (0.5)            | 6 (1.1)                      | 0.049 | 0.070 | 89 (0.7)                    | 67 (0.6)            | 63 (0.5)                     | 0.029 | 0.007 |
| Prior antiplatelet use         | 893 (14.0)                   | 1742 (33.2)         | 320 (58.5)                   | 1.045 | 0.524 | 3087 (25.1)                 | 2975 (24.6)         | 2838 (22.6)                  | 0.059 | 0.048 |
| Prior antihypertensive use     | 2625 (41.1)                  | 2727 (52.0)         | 346 (63.3)                   | 0.455 | 0.229 | 5818 (47.3)                 | 5699 (47.1)         | 5838 (46.4)                  | 0.018 | 0.014 |
| Prior statin use               | 759 (11.9)                   | 1182 (22.5)         | 199 (36.4)                   | 0.598 | 0.307 | 2165 (17.6)                 | 2140 (17.7)         | 1962 (15.6)                  | 0.054 | 0.056 |
| Prior lipid-lowering agent use | 101 (1.6)                    | 120 (2.3)           | 17 (3.1)                     | 0.101 | 0.051 | 255 (2.1)                   | 242 (2.0)           | 172 (1.4)                    | 0.055 | 0.049 |

|                            |              |              |              |       |       |              |               |               |       |       |
|----------------------------|--------------|--------------|--------------|-------|-------|--------------|---------------|---------------|-------|-------|
| Prior antidiabetic use     | 1314 (20.6)  | 1370 (26.1)  | 203 (37.1)   | 0.372 | 0.238 | 2961 (24.1)  | 2902 (24.0)   | 2777 (22.1)   | 0.047 | 0.045 |
| Multiple lesions           | 515 (8.1)    | 667 (12.7)   | 67 (12.2)    | 0.139 | 0.014 | 1341 (10.9)  | 1283 (10.6)   | 1244 (9.9)    | 0.033 | 0.024 |
| LASO                       |              |              |              | 0.370 | 0.139 |              |               |               | 0.065 | 0.042 |
| No stenosis                | 4155 (65.0)  | 2693 (51.4)  | 265 (48.4)   |       |       | 7064 (57.4)  | 6972 (57.7)   | 7270 (57.8)   |       |       |
| Mild (<50%)                | 525 (8.2)    | 581 (11.1)   | 76 (13.9)    |       |       | 1243 (10.1)  | 1210 (10.0)   | 1322 (10.5)   |       |       |
| Significant (≥50%)         | 992 (15.5)   | 1200 (22.9)  | 144 (26.3)   |       |       | 2376 (19.3)  | 2354 (19.5)   | 2379 (18.9)   |       |       |
| Occlusion                  | 719 (11.3)   | 769 (14.7)   | 62 (11.3)    |       |       | 1614 (13.1)  | 1555 (12.9)   | 1600 (12.7)   |       |       |
| In-hospital treatment      |              |              |              |       |       |              |               |               |       |       |
| Anti-diabetics             | 1413 (22.1)  | 1360 (25.9)  | 198 (36.2)   | 0.314 | 0.223 | 3022 (24.6)  | 2968 (24.5)   | 3210 (25.5)   | 0.022 | 0.023 |
| Anti-hypertensives         | 2624 (41.1)  | 2273 (43.4)  | 285 (52.1)   | 0.223 | 0.176 | 5246 (42.7)  | 5119 (42.3)   | 5645 (44.9)   | 0.045 | 0.052 |
| Anti-lipid lowering agents | 3713 (58.1)  | 3520 (67.1)  | 399 (72.9)   | 0.316 | 0.127 | 7735 (62.9)  | 7601 (62.9)   | 7928 (63.1)   | 0.003 | 0.004 |
| Statins                    | 5800 (90.8)  | 4885 (93.2)  | 498 (91.0)   | 0.010 | 0.079 | 11289 (91.8) | 11121 (92.0)  | 11578 (92.1)  | 0.011 | 0.005 |
| Lab finding, mean (SD)     |              |              |              |       |       |              |               |               |       |       |
| WBC count                  | 8.0 (2.8)    | 8.0 (2.8)    | 8.0 (3.4)    | 0.007 | 0.006 | 8.0 (3.9)    | 8.0 (4.3)     | 7.9 (13.7)    | 0.015 | 0.014 |
| Creatinine                 | 0.93 (0.85)  | 1.03 (0.98)  | 1.12 (1.22)  | 0.176 | 0.073 | 1.02 (1.61)  | 1.00 (1.29)   | 0.99 (4.33)   | 0.010 | 0.003 |
| Hemoglobin                 | 13.9 (1.9)   | 13.8 (1.8)   | 13.4 (1.8)   | 0.285 | 0.199 | 13.8 (2.7)   | 13.8 (2.8)    | 13.8 (8.5)    | 0.001 | 0.002 |
| Platelet count             | 233.8 (65.9) | 236.3 (68.9) | 230.4 (72.4) | 0.049 | 0.084 | 235.3 (96.2) | 235.0 (101.9) | 233.1 (327.7) | 0.009 | 0.008 |
| LDL-cholesterol            | 114.8 (35.6) | 108.5 (36.7) | 100.2 (38.7) | 0.394 | 0.221 | 111.2 (50.2) | 111.5 (56.2)  | 113.0 (184.8) | 0.013 | 0.011 |
| Glucose                    | 141.6 (60.3) | 146.8 (64.7) | 153.7 (67.7) | 0.189 | 0.104 | 144.7 (87.6) | 144.7 (94.3)  | 141.7 (287.7) | 0.014 | 0.014 |
| Systolic blood pressure    | 151.9 (28.5) | 149.5 (26.9) | 146.5 (26.9) | 0.197 | 0.113 | 150.2 (38.5) | 150.5 (41.5)  | 151.9 (137.9) | 0.017 | 0.014 |

ASD: absolute standardized difference.

\*An ASD of >0.1 is considered a meaningful imbalance.

Supplemental Table 5. Propensity score analysis of sensitivity analysis for NIHSS scores of 0-3

|                                | Before multiple treatment PS |                     |                   |       |       | After multiple treatment PS |                     |                   |       |       |
|--------------------------------|------------------------------|---------------------|-------------------|-------|-------|-----------------------------|---------------------|-------------------|-------|-------|
|                                | Aspirin monotherapy          | Clopidogrel-aspirin | Other combination | ASD1  | ASD2  | Aspirin monotherapy         | Clopidogrel-aspirin | Other combination | ASD1  | ASD2  |
| N                              | 5112                         | 3920                | 453               |       |       | 9570                        | 9412                | 9639              |       |       |
| Age (yr), mean (SD)            | 63.7±13.4                    | 66.1±12.5           | 67.8±11.4         | 0.329 | 0.143 | 65.0±17.9                   | 65.0±19.8           | 66.4±55.9         | 0.035 | 0.034 |
| Male, n (%)                    | 3193 (62.5)                  | 2473 (63.1)         | 262 (57.8)        | 0.095 | 0.108 | 5940 (62.1)                 | 5868 (62.3)         | 6049 (62.8)       | 0.014 | 0.009 |
| Onset-to-admission time        |                              |                     |                   | 0.050 | 0.012 |                             |                     |                   | 0.011 | 0.010 |
| Within 12 h                    | 3830 (74.9)                  | 3040 (77.6)         | 349 (77.0)        |       |       | 7271 (76.0)                 | 7156 (76.0)         | 7368 (76.4)       |       |       |
| 12 h-24 h                      | 1282 (25.1)                  | 880 (22.4)          | 104 (23.0)        |       |       | 2299 (24.0)                 | 2256 (24.0)         | 2270 (23.6)       |       |       |
| Body mass index, mean (SD)     | 24.0±3.3                     | 24.0±3.2            | 24.1±3.4          | 0.038 | 0.024 | 24.0±4.4                    | 24.0±5.0            | 24.0±15.5         | 0.006 | 0.005 |
| NIHSS score, median (IQR)      | 1 (0 - 2)                    | 1 (0 - 2)           | 2 (1 - 3)         | 0.108 | 0.093 | 1 (0 - 2)                   | 1 (0 - 2)           | 1 (1 - 3)         | 0.021 | 0.023 |
| TOAST                          |                              |                     |                   | 0.298 | 0.081 |                             |                     |                   | 0.118 | 0.118 |
| LAA                            | 1808 (35.4)                  | 1893 (48.3)         | 222 (49.0)        |       |       | 3973 (41.5)                 | 3920 (41.6)         | 4131 (42.9)       |       |       |
| SVO                            | 1816 (35.5)                  | 1082 (27.6)         | 135 (29.8)        |       |       | 3013 (31.5)                 | 2962 (31.5)         | 3052 (31.7)       |       |       |
| OE                             | 174 (3.4)                    | 150 (3.8)           | 13 (2.9)          |       |       | 339 (3.5)                   | 349 (3.7)           | 241 (2.5)         |       |       |
| UD                             | 1314 (25.7)                  | 795 (20.3)          | 83 (18.3)         |       |       | 2245 (23.5)                 | 2182 (23.2)         | 2214 (23.0)       |       |       |
| History of TIA                 | 73 (1.4)                     | 143 (3.6)           | 22 (4.9)          | 0.197 | 0.060 | 254 (2.7)                   | 233 (2.5)           | 240 (2.5)         | 0.010 | 0.001 |
| History of stroke              | 474 (9.3)                    | 750 (19.1)          | 180 (39.7)        | 0.757 | 0.464 | 1441 (15.1)                 | 1406 (14.9)         | 1295 (13.4)       | 0.046 | 0.043 |
| History of PAD                 | 10 (0.2)                     | 19 (0.5)            | 2 (0.4)           | 0.044 | 0.006 | 39 (0.4)                    | 30 (0.3)            | 18 (0.2)          | 0.040 | 0.027 |
| History of CAD                 | 206 (4.0)                    | 376 (9.6)           | 71 (15.7)         | 0.398 | 0.184 | 690 (7.2)                   | 653 (6.9)           | 530 (5.5)         | 0.070 | 0.060 |
| Hypertension                   | 3024 (59.2)                  | 2641 (67.4)         | 336 (74.2)        | 0.323 | 0.150 | 6088 (63.6)                 | 5965 (63.4)         | 6458 (67.0)       | 0.071 | 0.076 |
| Diabetes mellitus              | 1420 (27.8)                  | 1282 (32.7)         | 194 (42.8)        | 0.319 | 0.210 | 2958 (30.9)                 | 2916 (31.0)         | 2930 (30.4)       | 0.011 | 0.013 |
| Dyslipidemia                   | 1375 (26.9)                  | 1375 (35.1)         | 171 (37.7)        | 0.234 | 0.056 | 2889 (30.2)                 | 2907 (30.9)         | 2696 (28.0)       | 0.049 | 0.064 |
| Smoking status                 |                              |                     |                   | 0.219 | 0.122 |                             |                     |                   | 0.023 | 0.052 |
| Never smoker                   | 2899 (56.7)                  | 2313 (59.0)         | 279 (61.6)        |       |       | 5571 (58.2)                 | 5452 (57.9)         | 5482 (56.9)       |       |       |
| Ex-smoker, >5yr                | 415 (8.1)                    | 374 (9.5)           | 48 (10.6)         |       |       | 812 (8.5)                   | 826 (8.8)           | 768 (8.0)         |       |       |
| Recent smoker, within 5yr      | 265 (5.2)                    | 201 (5.1)           | 28 (6.2)          |       |       | 502 (5.2)                   | 494 (5.2)           | 445 (4.6)         |       |       |
| Current smoker                 | 1533 (30.0)                  | 1032 (26.3)         | 98 (21.6)         |       |       | 2685 (28.1)                 | 2640 (28.1)         | 2944 (30.5)       |       |       |
| Atrial fibrillation            | 34 (0.7)                     | 20 (0.5)            | 8 (1.8)           | 0.101 | 0.119 | 76 (0.8)                    | 58 (0.6)            | 49 (0.5)          | 0.036 | 0.015 |
| Prior antiplatelet use         | 702 (13.7)                   | 1322 (33.7)         | 253 (55.8)        | 0.986 | 0.456 | 2373 (24.8)                 | 2283 (24.3)         | 2234 (23.2)       | 0.038 | 0.025 |
| Prior antihypertensive use     | 2071 (40.5)                  | 2008 (51.2)         | 278 (61.4)        | 0.427 | 0.206 | 4441 (46.4)                 | 4347 (46.2)         | 4673 (48.5)       | 0.042 | 0.046 |
| Prior statin use               | 613 (12.0)                   | 919 (23.4)          | 155 (34.2)        | 0.547 | 0.240 | 1704 (17.8)                 | 1687 (17.9)         | 1530 (15.9)       | 0.052 | 0.055 |
| Prior lipid-lowering agent use | 75 (1.5)                     | 92 (2.3)            | 13 (2.9)          | 0.096 | 0.033 | 186 (1.9)                   | 179 (1.9)           | 140 (1.4)         | 0.039 | 0.035 |

|                            |             |             |            |       |       |             |             |             |       |       |
|----------------------------|-------------|-------------|------------|-------|-------|-------------|-------------|-------------|-------|-------|
| Prior antidiabetic use     | 1006 (19.7) | 994 (25.4)  | 154 (34.0) | 0.327 | 0.190 | 2202 (23.0) | 2174 (23.1) | 2112 (21.9) | 0.026 | 0.028 |
| Multiple lesions           | 420 (8.2)   | 506 (12.9)  | 57 (12.6)  | 0.143 | 0.010 | 1067 (11.2) | 1018 (10.8) | 993 (10.3)  | 0.027 | 0.017 |
| LASO                       |             |             |            | 0.360 | 0.120 |             |             |             | 0.050 | 0.035 |
| No stenosis                | 3352 (65.6) | 2043 (52.1) | 223 (49.2) |       |       | 5581 (58.3) | 5501 (58.4) | 5470 (56.7) |       |       |
| Mild (<50%)                | 411 (8.0)   | 388 (9.9)   | 60 (13.2)  |       |       | 900 (9.4)   | 889 (9.5)   | 939 (9.7)   |       |       |
| Significant (≥50%)         | 795 (15.6)  | 923 (23.5)  | 116 (25.6) |       |       | 1854 (19.4) | 1845 (19.6) | 1974 (20.5) |       |       |
| Occlusion                  | 554 (10.8)  | 566 (14.4)  | 54 (11.9)  |       |       | 1236 (12.9) | 1176 (12.5) | 1257 (13.0) |       |       |
| In-hospital treatment      |             |             |            |       |       |             |             |             |       |       |
| Anti-diabetics             | 1070 (20.9) | 987 (25.2)  | 150 (33.1) | 0.277 | 0.175 | 2235 (23.4) | 2200 (23.4) | 2400 (24.9) | 0.036 | 0.036 |
| Anti-hypertensives         | 2062 (40.3) | 1635 (41.7) | 240 (53.0) | 0.256 | 0.227 | 3990 (41.7) | 3877 (41.2) | 4260 (44.2) | 0.051 | 0.061 |
| Anti-lipid lowering agents | 2968 (58.1) | 2591 (66.1) | 327 (72.2) | 0.300 | 0.132 | 5965 (62.3) | 5877 (62.4) | 5960 (61.8) | 0.010 | 0.012 |
| Statins                    | 4628 (90.5) | 3651 (93.1) | 405 (89.4) | 0.038 | 0.133 | 8767 (91.6) | 8649 (91.9) | 8820 (91.5) | 0.004 | 0.014 |
| Lab finding, mean (SD)     |             |             |            |       |       |             |             |             |       |       |
| WBC count                  | 8.0±2.9     | 8.0±2.8     | 8.1±3.5    | 0.006 | 0.011 | 8.0±4.0     | 8.0±4.3     | 8.0±13.2    | 0.009 | 0.008 |
| Creatinine                 | 0.93±0.85   | 1.02±0.94   | 1.07±0.95  | 0.160 | 0.052 | 1.00±1.50   | 0.99±1.26   | 0.99±3.94   | 0.001 | 0.003 |
| Hemoglobin                 | 14.0±1.9    | 13.8±1.8    | 13.5±1.8   | 0.273 | 0.197 | 13.9±2.6    | 13.9±2.8    | 13.9±7.9    | 0.000 | 0.001 |
| Platelet count             | 233.4±65.0  | 235.9±69.0  | 230.2±70.0 | 0.047 | 0.082 | 235.5±94.9  | 234.7±104.0 | 236.3±314.0 | 0.004 | 0.007 |
| LDL-cholesterol            | 114.0±35.0  | 107.7±36.0  | 100.3±36.8 | 0.383 | 0.204 | 110.4±48.7  | 110.7±55.8  | 111.5±167.4 | 0.008 | 0.006 |
| Glucose                    | 139.8±58.4  | 145.3±63.0  | 149.9±66.3 | 0.162 | 0.071 | 142.7±83.6  | 142.9±92.9  | 141.4±279.1 | 0.006 | 0.007 |
| Systolic blood pressure    | 150.9±28.0  | 149.1±26.8  | 145.5±26.0 | 0.203 | 0.137 | 149.5±37.5  | 149.7±41.9  | 151.8±128.0 | 0.024 | 0.021 |

Supplemental Table 6. Sensitivity analysis for NIHSS scores of 0-3

|                     | crude HR (95% CI) | p      | adjusted HR (95% CI) | p      | IPTW <sup>b</sup> , weighted HR (95% CI) | P      |
|---------------------|-------------------|--------|----------------------|--------|------------------------------------------|--------|
| Primary outcome     |                   |        |                      |        |                                          |        |
| other combination   | 1(Ref)            |        | 1(Ref)               |        | 1(Ref)                                   |        |
| aspirin monotherapy | 0.98 (0.76-1.27)  | 0.8862 | 1.25 (0.95-1.64)     | 0.1100 | 0.96 (0.65-1.40)                         | 0.8199 |
| clopidogrel-aspirin | 0.83 (0.63-1.08)  | 0.1699 | 0.91 (0.69-1.19)     | 0.4734 | 0.69 (0.47-1.02)                         | 0.0623 |
| All-stroke          |                   |        |                      |        |                                          |        |
| other combination   | 1(Ref)            |        | 1(Ref)               |        | 1(Ref)                                   |        |
| aspirin monotherapy | 0.94 (0.72-1.23)  | 0.6461 | 1.18 (0.89-1.55)     | 0.2525 | 0.89 (0.61-1.31)                         | 0.5627 |
| clopidogrel-aspirin | 0.80 (0.61-1.05)  | 0.1022 | 0.86 (0.65-1.13)     | 0.2695 | 0.65 (0.44-0.96)                         | 0.0296 |
| All-cause mortality |                   |        |                      |        |                                          |        |
| other combination   | 1(Ref)            |        | 1(Ref)               |        | 1(Ref)                                   |        |
| aspirin monotherapy | 1.98 (0.62-6.29)  | 0.2467 | 2.97 (0.91-9.67)     | 0.0700 | 8.08 (2.11-30.98)                        | 0.0023 |
| clopidogrel-aspirin | 1.70 (0.53-5.47)  | 0.3722 | 2.19 (0.67-7.16)     | 0.1948 | 6.03 (1.56-23.34)                        | 0.0092 |
| MI <sup>a</sup>     |                   |        |                      |        |                                          |        |
| other combination   | 1(Ref)            |        |                      |        |                                          |        |
| aspirin monotherapy | 1.47 (0.08-28.17) | 0.7977 | Non-estimable        |        | Non-estimable                            |        |
| clopidogrel-aspirin | 3.02 (0.16-56.05) | 0.4586 | Non-estimable        |        | Non-estimable                            |        |

Adjusted variables: age; male sex; initial NIHSS score; arrival time; TOAST classification; history of TIA, stroke, CAD, PAD; HTN; DM; dyslipidemia; smoking; atrial fibrillation; prior antiplatelet, antihypertensive, antidiabetic, statin, or lipid-lowering agent use; multiple lesions; LASO; discharge medications of antihypertensives, antidiabetics, statins, and lipid-lowering agents; creatinine; hemoglobin; platelet count; LDL-C; glucose; and SBP.

<sup>a</sup> Cox PH regression using Firth's penalized maximum likelihood method.

<sup>b</sup> Weighted Cox proportional hazards model with robust standard errors.

Supplemental Table 7. Propensity score analysis of sensitivity analysis for patients with first ever stroke

|                                | Before multiple treatment PS |                     |                   |       |       | After multiple treatment PS |                     |                   |       |       |
|--------------------------------|------------------------------|---------------------|-------------------|-------|-------|-----------------------------|---------------------|-------------------|-------|-------|
|                                | Aspirin monotherapy          | Clopidogrel-aspirin | Other combination | ASD1  | ASD2  | Aspirin monotherapy         | Clopidogrel-aspirin | Other combination | ASD1  | ASD2  |
| N                              | 5752                         | 4205                | 347               |       |       | 10388                       | 10229               | 10386             |       |       |
| Age (yrs.), mean (SD)          | 63.9±13.5                    | 66.1±12.7           | 67.9±11.8         | 0.316 | 0.146 | 65.0±17.8                   | 65.0±20.1           | 65.5±69.2         | 0.010 | 0.008 |
| Male, n (%)                    | 3530 (61.4)                  | 2610 (62.1)         | 193 (55.6)        | 0.117 | 0.131 | 6369 (61.3)                 | 6273 (61.3)         | 6442 (62.0)       | 0.015 | 0.015 |
| Onset-to-admission time        |                              |                     |                   | 0.031 | 0.069 |                             |                     |                   | 0.007 | 0.007 |
| Within 12 h                    | 4223 (73.4)                  | 3157 (75.1)         | 250 (72.0)        |       |       | 7689 (74.0)                 | 7569 (74.0)         | 7718 (74.3)       |       |       |
| 12 h-24 h                      | 1529 (26.6)                  | 1048 (24.9)         | 97 (28.0)         |       |       | 2699 (26.0)                 | 2660 (26.0)         | 2668 (25.7)       |       |       |
| Body mass index, mean (SD)     | 23.9±3.3                     | 23.9±3.3            | 24.1±3.3          | 0.044 | 0.051 | 23.9±4.4                    | 23.9±5.1            | 23.9±17.4         | 0.006 | 0.005 |
| NIHSS score, median (IQR)      | 2 (1 - 3)                    | 2 (1 - 3)           | 2 (1 - 3)         | 0.094 | 0.011 | 2 (1 - 3)                   | 2 (1 - 3)           | 2 (1 - 3)         | 0.014 | 0.014 |
| TOAST                          |                              |                     |                   | 0.275 | 0.069 |                             |                     |                   | 0.080 | 0.080 |
| LAA                            | 2056 (35.7)                  | 2053 (48.8)         | 171 (49.3)        |       |       | 4362 (42.0)                 | 4293 (42.0)         | 4195 (40.4)       |       |       |
| SVO                            | 2132 (37.1)                  | 1199 (28.5)         | 106 (30.5)        |       |       | 3401 (32.7)                 | 3348 (32.7)         | 3687 (35.5)       |       |       |
| OE                             | 189 (3.3)                    | 152 (3.6)           | 9 (2.6)           |       |       | 366 (3.5)                   | 366 (3.6)           | 264 (2.5)         |       |       |
| UD                             | 1375 (23.9)                  | 801 (19.0)          | 61 (17.6)         |       |       | 2260 (21.8)                 | 2222 (21.7)         | 2239 (21.6)       |       |       |
| History of TIA                 | 77 (1.3)                     | 134 (3.2)           | 20 (5.8)          | 0.241 | 0.125 | 229 (2.2)                   | 227 (2.2)           | 218 (2.1)         | 0.007 | 0.008 |
| History of PAD                 | 11 (0.2)                     | 21 (0.5)            | 3 (0.9)           | 0.093 | 0.044 | 30 (0.3)                    | 34 (0.3)            | 25 (0.2)          | 0.009 | 0.016 |
| History of CAD                 | 188 (3.3)                    | 364 (8.7)           | 39 (11.2)         | 0.311 | 0.086 | 597 (5.7)                   | 591 (5.8)           | 497 (4.8)         | 0.043 | 0.044 |
| Hypertension                   | 3364 (58.5)                  | 2773 (65.9)         | 244 (70.3)        | 0.249 | 0.094 | 6444 (62.0)                 | 6338 (62.0)         | 6811 (65.6)       | 0.074 | 0.075 |
| Diabetes mellitus              | 1611 (28.0)                  | 1345 (32.0)         | 135 (38.9)        | 0.233 | 0.145 | 3157 (30.4)                 | 3107 (30.4)         | 3142 (30.3)       | 0.003 | 0.003 |
| Dyslipidemia                   | 1543 (26.8)                  | 1334 (31.7)         | 115 (33.1)        | 0.138 | 0.030 | 3005 (28.9)                 | 3003 (29.4)         | 3041 (29.3)       | 0.008 | 0.002 |
| Smoking status                 |                              |                     |                   | 0.129 | 0.069 |                             |                     |                   | 0.061 | 0.061 |
| Never smoker                   | 3244 (56.4)                  | 2423 (57.6)         | 213 (61.4)        |       |       | 5944 (57.2)                 | 5850 (57.2)         | 5834 (56.2)       |       |       |
| Ex-smoker, >5 yrs.             | 451 (7.8)                    | 368 (8.8)           | 31 (8.9)          |       |       | 840 (8.1)                   | 841 (8.2)           | 795 (7.7)         |       |       |
| Recent smoker, within 5 yrs.   | 283 (4.9)                    | 189 (4.5)           | 15 (4.3)          |       |       | 496 (4.8)                   | 490 (4.8)           | 416 (4.0)         |       |       |
| Current smoker                 | 1774 (30.8)                  | 1225 (29.1)         | 88 (25.4)         |       |       | 3108 (29.9)                 | 3047 (29.8)         | 3341 (32.2)       |       |       |
| Atrial fibrillation            | 37 (0.6)                     | 18 (0.4)            | 5 (1.4)           | 0.079 | 0.105 | 59 (0.6)                    | 57 (0.6)            | 39 (0.4)          | 0.027 | 0.026 |
| Prior antiplatelet use         | 544 (9.5)                    | 942 (22.4)          | 125 (36.0)        | 0.668 | 0.303 | 1701 (16.4)                 | 1632 (16.0)         | 1552 (14.9)       | 0.039 | 0.028 |
| Prior antihypertensive use     | 2222 (38.6)                  | 2005 (47.7)         | 193 (55.6)        | 0.345 | 0.159 | 4487 (43.2)                 | 4417 (43.2)         | 4538 (43.7)       | 0.010 | 0.010 |
| Prior statin use               | 563 (9.8)                    | 691 (16.4)          | 67 (19.3)         | 0.273 | 0.075 | 1362 (13.1)                 | 1324 (12.9)         | 1294 (12.5)       | 0.020 | 0.015 |
| Prior lipid-lowering agent use | 90 (1.6)                     | 85 (2.0)            | 5 (1.4)           | 0.010 | 0.045 | 205 (2.0)                   | 184 (1.8)           | 196 (1.9)         | 0.007 | 0.006 |
| Prior antidiabetic use         | 1108 (19.3)                  | 1005 (23.9)         | 101 (29.1)        | 0.231 | 0.118 | 2252 (21.7)                 | 2228 (21.8)         | 2201 (21.2)       | 0.012 | 0.014 |

|                            |             |             |            |       |       |             |             |             |       |       |
|----------------------------|-------------|-------------|------------|-------|-------|-------------|-------------|-------------|-------|-------|
| Multiple lesions           | 450 (7.8)   | 533 (12.7)  | 44 (12.7)  | 0.161 | 0.000 | 1080 (10.4) | 1054 (10.3) | 1007 (9.7)  | 0.023 | 0.020 |
| LASO                       |             |             |            | 0.320 | 0.142 |             |             |             | 0.031 | 0.031 |
| No stenosis                | 3789 (65.9) | 2199 (52.3) | 181 (52.2) |       |       | 6126 (59.0) | 6047 (59.1) | 6062 (58.4) |       |       |
| Mild (<50%)                | 451 (7.8)   | 454 (10.8)  | 48 (13.8)  |       |       | 1011 (9.7)  | 980 (9.6)   | 1022 (9.8)  |       |       |
| Significant (≥50%)         | 884 (15.4)  | 939 (22.3)  | 79 (22.8)  |       |       | 1928 (18.6) | 1923 (18.8) | 1973 (19.0) |       |       |
| Occlusion                  | 628 (10.9)  | 613 (14.6)  | 39 (11.2)  |       |       | 1322 (12.7) | 1278 (12.5) | 1329 (12.8) |       |       |
| In-hospital treatment      |             |             |            |       |       |             |             |             |       |       |
| Anti-diabetics             | 1230 (21.4) | 1057 (25.1) | 108 (31.1) | 0.223 | 0.133 | 2434 (23.4) | 2394 (23.4) | 2738 (26.4) | 0.068 | 0.068 |
| Anti-hypertensives         | 2326 (40.4) | 1796 (42.7) | 172 (49.6) | 0.184 | 0.138 | 4313 (41.5) | 4232 (41.4) | 4552 (43.8) | 0.047 | 0.050 |
| Anti-lipid lowering agents | 3355 (58.3) | 2827 (67.2) | 247 (71.2) | 0.272 | 0.086 | 6525 (62.8) | 6409 (62.7) | 6432 (61.9) | 0.018 | 0.015 |
| Statins                    | 5225 (90.8) | 3924 (93.3) | 311 (89.6) | 0.041 | 0.132 | 9540 (91.8) | 9414 (92.0) | 9446 (90.9) | 0.032 | 0.039 |
| Lab finding, mean (SD)     |             |             |            |       |       |             |             |             |       |       |
| WBC count                  | 8.1±2.8     | 8.1±2.8     | 8.1±3.5    | 0.015 | 0.011 | 8.1±3.8     | 8.1±4.4     | 7.9±15.5    | 0.013 | 0.012 |
| Creatinine                 | 0.91±0.80   | 1.01±0.94   | 1.10±1.29  | 0.175 | 0.073 | 0.98±1.54   | 0.97±1.23   | 0.96±4.67   | 0.008 | 0.003 |
| Hemoglobin                 | 14.0±1.9    | 13.9±1.8    | 13.6±1.8   | 0.211 | 0.139 | 13.9±2.6    | 13.9±2.8    | 13.9±9.7    | 0.001 | 0.001 |
| Platelet count             | 234.6±65.9  | 237.7±68.0  | 232.0±69.3 | 0.038 | 0.084 | 236.7±93.3  | 236.2±103.2 | 236.5±377.5 | 0.001 | 0.001 |
| LDL-cholesterol            | 116.3±35.3  | 111.9±35.9  | 109.7±39.2 | 0.176 | 0.060 | 114.1±47.9  | 114.4±56.5  | 114.7±206.5 | 0.004 | 0.002 |
| Glucose                    | 141.1±60.0  | 147.1±65.5  | 148.8±66.0 | 0.122 | 0.026 | 144.1±85.5  | 144.1±96.2  | 143.1±343.0 | 0.004 | 0.004 |
| Systolic blood pressure    | 152.5±28.5  | 149.7±27.4  | 146.6±26.4 | 0.216 | 0.116 | 151.0±37.7  | 151.1±43.4  | 152.6±154.5 | 0.014 | 0.013 |

Supplemental Table 8. Sensitivity analysis for patients with first-ever stroke

|                                               | crude HR (95% CI) | p      | adjusted HR (95% CI) | p      | IPTW <sup>b</sup> , weighted HR (95% CI) | P      |
|-----------------------------------------------|-------------------|--------|----------------------|--------|------------------------------------------|--------|
| Composite events of stroke, MI, and all-death |                   |        |                      |        |                                          |        |
| other combination                             | 1(Ref)            |        | 1(Ref)               |        | 1(Ref)                                   |        |
| aspirin monotherapy                           | 0.91 (0.69-1.21)  | 0.5301 | 1.05 (0.79-1.40)     | 0.7118 | 0.96 (0.67-1.38)                         | 0.8315 |
| clopidogrel-aspirin                           | 0.86 (0.65-1.14)  | 0.3004 | 0.88 (0.66-1.17)     | 0.3813 | 0.82 (0.57-1.18)                         | 0.2738 |
| all-stroke                                    |                   |        |                      |        |                                          |        |
| other combination                             | 1(Ref)            |        | 1(Ref)               |        | 1(Ref)                                   |        |
| aspirin monotherapy                           | 0.87 (0.66-1.15)  | 0.3369 | 1.00 (0.75-1.33)     | 0.9960 | 0.90 (0.63-1.30)                         | 0.5855 |
| clopidogrel-aspirin                           | 0.82 (0.62-1.09)  | 0.1799 | 0.84 (0.63-1.12)     | 0.2289 | 0.77 (0.53-1.11)                         | 0.1628 |
| all-death                                     |                   |        |                      |        |                                          |        |
| other combination                             | 1(Ref)            |        | 1(Ref)               |        | 1(Ref)                                   |        |
| aspirin monotherapy                           | 4.49 (0.62-32.28) | 0.1356 | 6.58 (0.90-47.79)    | 0.0627 | 13.84 (1.91-100.17)                      | 0.0093 |
| clopidogrel-aspirin                           | 4.22 (0.58-30.51) | 0.1537 | 5.24 (0.72-38.23)    | 0.1021 | 11.13 (1.53-81.04)                       | 0.0174 |
| MI <sup>a</sup>                               |                   |        |                      |        |                                          |        |
| other combination                             | 1(Ref)            |        |                      |        |                                          |        |
| aspirin monotherapy                           | 1.22 (0.06-23.07) | 0.8927 | Non-estimable        |        | Non-estimable                            |        |
| clopidogrel-aspirin                           | 1.83 (0.10-34.29) | 0.6862 | Non-estimable        |        | Non-estimable                            |        |

Adjusted variables: age; male sex; initial NIHSS score; arrival time; TOAST classification; history of TIA, stroke, CAD, PAD; HTN; DM; dyslipidemia; smoking; atrial fibrillation; prior antiplatelet, antihypertensive, antidiabetic, statin, or lipid-lowering agent use; multiple lesions; LASO; discharge medications of antihypertensives, antidiabetics, statins, and lipid-lowering agents; creatinine; hemoglobin; platelet count; LDL-C; glucose; and SBP.

<sup>a</sup> Cox PH regression using Firth's penalized maximum likelihood method.

<sup>b</sup> Weighted Cox proportional hazards model with robust standard errors.



Supplemental Table 9. Propensity score analysis of sensitivity analysis for the study periods between 2014 and 2018

|                              | Before multiple treatment PS |                     |                   |                     |                      | After multiple treatment PS |                     |                   |                     |                      |
|------------------------------|------------------------------|---------------------|-------------------|---------------------|----------------------|-----------------------------|---------------------|-------------------|---------------------|----------------------|
|                              | Aspirin monotherapy          | Clopidogrel-aspirin | Other combination | AM vs other<br>ASD1 | C-A vs other<br>ASD2 | Aspirin monotherapy         | Clopidogrel-aspirin | Other combination | AM vs other<br>ASD1 | C-A vs other<br>ASD2 |
| N                            | 3815                         | 4077                | 394               |                     |                      | 8347                        | 8253                | 8403              |                     |                      |
| Age (yrs.), mean (SD)        | 64.7±13.6                    | 66.7±12.6           | 68.2±11.9         | 0.276               | 0.119                | 66.0±19.5                   | 65.9±18.2           | 66.1±58.6         | 0.003               | 0.003                |
| Male, n (%)                  | 2350 (61.6)                  | 2565 (62.9)         | 230 (58.4)        | 0.066               | 0.093                | 5170 (61.9)                 | 5117 (62.0)         | 5016 (59.7)       | 0.046               | 0.047                |
| Onset-to-admission time      |                              |                     |                   | 0.105               | 0.060                |                             |                     |                   | 0.018               | 0.021                |
| Within 12 h                  | 2801 (73.4)                  | 3073 (75.4)         | 307 (77.9)        |                     |                      | 6214 (74.5)                 | 6153 (74.6)         | 6189 (73.7)       |                     |                      |
| 12 h-24 h                    | 1014 (26.6)                  | 1004 (24.6)         | 87 (22.1)         |                     |                      | 2133 (25.5)                 | 2100 (25.4)         | 2214 (26.3)       |                     |                      |
| Body mass index, mean (SD)   | 24.0±3.4                     | 24.0±3.2            | 24.1±3.4          | 0.038               | 0.045                | 24.0±5.0                    | 24.0±4.6            | 23.9±15.0         | 0.011               | 0.010                |
| NIHSS score, median (IQR)    | 2 (1 - 3)                    | 2 (1 - 3)           | 2 (1 - 4)         | 0.139               | 0.036                | 2 (1 - 3)                   | 2 (1 - 3)           | 2 (1 - 3)         | 0.020               | 0.024                |
| TOAST                        |                              |                     |                   | 0.330               | 0.065                |                             |                     |                   | 0.113               | 0.114                |
| LAA                          | 1314 (34.4)                  | 1955 (48.0)         | 198 (50.3)        |                     |                      | 3552 (42.6)                 | 3478 (42.1)         | 3365 (40.0)       |                     |                      |
| SVO                          | 1397 (36.6)                  | 1177 (28.9)         | 115 (29.2)        |                     |                      | 2630 (31.5)                 | 2631 (31.9)         | 3070 (36.5)       |                     |                      |
| OE                           | 144 (3.8)                    | 143 (3.5)           | 12 (3.0)          |                     |                      | 305 (3.7)                   | 306 (3.7)           | 277 (3.3)         |                     |                      |
| UD                           | 960 (25.2)                   | 802 (19.7)          | 69 (17.5)         |                     |                      | 1860 (22.3)                 | 1839 (22.3)         | 1691 (20.1)       |                     |                      |
| History of TIA               | 47 (1.2)                     | 125 (3.1)           | 14 (3.6)          | 0.152               | 0.027                | 175 (2.1)                   | 183 (2.2)           | 198 (2.4)         | 0.017               | 0.009                |
| History of stroke            | 388 (10.2)                   | 774 (19.0)          | 168 (42.6)        | 0.792               | 0.530                | 1338 (16.0)                 | 1339 (16.2)         | 1213 (14.4)       | 0.045               | 0.050                |
| History of PAD               | 6 (0.2)                      | 22 (0.5)            | 2 (0.5)           | 0.061               | 0.004                | 26 (0.3)                    | 30 (0.4)            | 18 (0.2)          | 0.020               | 0.028                |
| History of CAD               | 170 (4.5)                    | 352 (8.6)           | 57 (14.5)         | 0.347               | 0.183                | 615 (7.4)                   | 580 (7.0)           | 539 (6.4)         | 0.038               | 0.025                |
| Hypertension                 | 2304 (60.4)                  | 2733 (67.0)         | 290 (73.6)        | 0.284               | 0.144                | 5408 (64.8)                 | 5325 (64.5)         | 5747 (68.4)       | 0.076               | 0.082                |
| Diabetes mellitus            | 1088 (28.5)                  | 1355 (33.2)         | 176 (44.7)        | 0.340               | 0.236                | 2658 (31.9)                 | 2626 (31.8)         | 2650 (31.5)       | 0.007               | 0.006                |
| Dyslipidemia                 | 984 (25.8)                   | 1359 (33.3)         | 154 (39.1)        | 0.287               | 0.120                | 2461 (29.5)                 | 2489 (30.2)         | 2477 (29.5)       | 0.000               | 0.015                |
| Smoking status               |                              |                     |                   | 0.197               | 0.121                |                             |                     |                   | 0.049               | 0.063                |
| Never smoker                 | 2192 (57.5)                  | 2430 (59.6)         | 242 (61.4)        |                     |                      | 4936 (59.1)                 | 4853 (58.8)         | 5013 (59.7)       |                     |                      |
| Ex-smoker, >5 yrs.           | 311 (8.2)                    | 363 (8.9)           | 38 (9.6)          |                     |                      | 694 (8.3)                   | 704 (8.5)           | 641 (7.6)         |                     |                      |
| Recent smoker, within 5 yrs. | 193 (5.1)                    | 202 (5.0)           | 26 (6.6)          |                     |                      | 426 (5.1)                   | 430 (5.2)           | 318 (3.8)         |                     |                      |
| Current smoker               | 1119 (29.3)                  | 1082 (26.5)         | 88 (22.3)         |                     |                      | 2290 (27.4)                 | 2266 (27.5)         | 2430 (28.9)       |                     |                      |
| Atrial fibrillation          | 26 (0.7)                     | 17 (0.4)            | 5 (1.3)           | 0.060               | 0.093                | 47 (0.6)                    | 47 (0.6)            | 34 (0.4)          | 0.022               | 0.022                |
| Prior antiplatelet use       | 545 (14.3)                   | 1255 (30.8)         | 222 (56.3)        | 0.980               | 0.534                | 2094 (25.1)                 | 2032 (24.6)         | 1925 (22.9)       | 0.051               | 0.040                |

|                                |             |             |            |       |       |             |             |             |       |       |
|--------------------------------|-------------|-------------|------------|-------|-------|-------------|-------------|-------------|-------|-------|
| Prior antihypertensive use     | 1572 (41.2) | 2054 (50.4) | 235 (59.6) | 0.375 | 0.187 | 3928 (47.1) | 3864 (46.8) | 3977 (47.3) | 0.005 | 0.010 |
| Prior statin use               | 532 (13.9)  | 909 (22.3)  | 140 (35.5) | 0.517 | 0.295 | 1574 (18.9) | 1576 (19.1) | 1510 (18.0) | 0.023 | 0.029 |
| Prior lipid-lowering agent use | 99 (2.6)    | 119 (2.9)   | 18 (4.6)   | 0.106 | 0.087 | 238 (2.9)   | 235 (2.8)   | 201 (2.4)   | 0.029 | 0.028 |
| Prior antidiabetic use         | 755 (19.8)  | 1014 (24.9) | 139 (35.3) | 0.352 | 0.228 | 1925 (23.1) | 1914 (23.2) | 1917 (22.8) | 0.006 | 0.009 |
| Multiple lesions               | 325 (8.5)   | 548 (13.4)  | 53 (13.5)  | 0.158 | 0.000 | 983 (11.8)  | 934 (11.3)  | 885 (10.5)  | 0.040 | 0.025 |
| LASO                           |             |             |            | 0.377 | 0.189 |             |             |             | 0.027 | 0.050 |
| No stenosis                    | 2498 (65.5) | 2171 (53.2) | 195 (49.5) |       |       | 4813 (57.7) | 4802 (58.2) | 4967 (59.1) |       |       |
| Mild (<50%)                    | 295 (7.7)   | 418 (10.3)  | 54 (13.7)  |       |       | 814 (9.8)   | 782 (9.5)   | 876 (10.4)  |       |       |
| Significant (≥50%)             | 583 (15.3)  | 893 (21.9)  | 102 (25.9) |       |       | 1584 (19.0) | 1587 (19.2) | 1488 (17.7) |       |       |
| Occlusion                      | 439 (11.5)  | 595 (14.6)  | 43 (10.9)  |       |       | 1135 (13.6) | 1083 (13.1) | 1073 (12.8) |       |       |
| In-hospital treatment          |             |             |            |       |       |             |             |             |       |       |
| Anti-diabetics                 | 796 (20.9)  | 1015 (24.9) | 140 (35.5) | 0.330 | 0.233 | 1967 (23.6) | 1951 (23.6) | 2227 (26.5) | 0.068 | 0.066 |
| Anti-hypertensives             | 1510 (39.6) | 1648 (40.4) | 195 (49.5) | 0.200 | 0.183 | 3388 (40.6) | 3350 (40.6) | 3593 (42.8) | 0.044 | 0.044 |
| Anti-lipid lowering agents     | 2204 (57.8) | 2660 (65.2) | 291 (73.9) | 0.344 | 0.188 | 5208 (62.4) | 5144 (62.3) | 5262 (62.6) | 0.005 | 0.006 |
| Statins                        | 3576 (93.7) | 3799 (93.2) | 361 (91.6) | 0.081 | 0.059 | 7770 (93.1) | 7704 (93.3) | 7737 (92.1) | 0.039 | 0.049 |
| Lab finding, mean (SD)         |             |             |            |       |       |             |             |             |       |       |
| WBC count                      | 8.1±2.8     | 8.0±2.8     | 7.9±3.2    | 0.068 | 0.044 | 8.1±4.2     | 8.1±4.0     | 8.1±4.8     | 0.003 | 0.004 |
| Creatinine                     | 0.93±0.85   | 1.02±0.89   | 1.09±1.15  | 0.153 | 0.072 | 1.00±1.58   | 0.99±1.15   | 0.99±4.25   | 0.004 | 0.001 |
| Hemoglobin                     | 13.9±1.9    | 13.8±1.8    | 13.4±1.8   | 0.273 | 0.202 | 13.8±2.9    | 13.8±2.6    | 13.9±8.4    | 0.004 | 0.003 |
| Platelet count                 | 235.3±66.1  | 236.4±68.3  | 228.8±72.8 | 0.093 | 0.107 | 235.7±100.8 | 235.6±95.4  | 234.5±320.4 | 0.005 | 0.005 |
| LDL-cholesterol                | 113.8±35.4  | 108.6±37.1  | 99.7±38.9  | 0.379 | 0.236 | 110.5±52.9  | 110.5±52.6  | 113.2±181.8 | 0.020 | 0.020 |
| Glucose                        | 142.8±60.3  | 146.9±63.8  | 152.3±65.1 | 0.151 | 0.083 | 145.4±92.0  | 145.3±88.4  | 144.5±278.2 | 0.005 | 0.004 |
| Systolic blood pressure        | 152.4±28.9  | 150.1±27.4  | 146.5±26.0 | 0.216 | 0.135 | 150.7±41.7  | 151.0±39.4  | 151.8±126.2 | 0.012 | 0.008 |

Supplemental Table 10. Sensitivity analysis for patients between 2014 and 2018

|                     | crude HR (95% CI) | p      | adjusted HR (95% CI) | p      | IPTW <sup>b</sup> , weighted HR (95% CI) | P      |
|---------------------|-------------------|--------|----------------------|--------|------------------------------------------|--------|
| Primary outcome     |                   |        |                      |        |                                          |        |
| other combination   | 1(Ref)            |        | 1(Ref)               |        | 1(Ref)                                   |        |
| aspirin monotherapy | 0.83 (0.64-1.07)  | 0.1516 | 0.96 (0.74-1.26)     | 0.7910 | 0.85 (0.59-1.24)                         | 0.4099 |
| clopidogrel-aspirin | 0.80 (0.62-1.04)  | 0.0962 | 0.82 (0.63-1.06)     | 0.1357 | 0.72 (0.49-1.04)                         | 0.0783 |
| All-stroke          |                   |        |                      |        |                                          |        |
| other combination   | 1(Ref)            |        | 1(Ref)               |        | 1(Ref)                                   |        |
| aspirin monotherapy | 0.79 (0.61-1.02)  | 0.0727 | 0.91 (0.69-1.20)     | 0.5015 | 0.79 (0.54-1.15)                         | 0.2238 |
| clopidogrel-aspirin | 0.78 (0.60-1.01)  | 0.0627 | 0.79 (0.60-1.03)     | 0.0836 | 0.68 (0.47-0.99)                         | 0.0425 |
| All-cause mortality |                   |        |                      |        |                                          |        |
| other combination   | 1(Ref)            |        | 1(Ref)               |        | 1(Ref)                                   |        |
| aspirin monotherapy | 1.76 (0.55-5.62)  | 0.3421 | 1.83 (0.56-5.98)     | 0.3207 | 7.86 (2.01-30.79)                        | 0.0031 |
| clopidogrel-aspirin | 1.50 (0.47-4.82)  | 0.4943 | 1.23 (0.38-4.04)     | 0.7280 | 5.41 (1.38-21.18)                        | 0.0153 |
| MI <sup>a</sup>     |                   |        |                      |        |                                          |        |
| other combination   | 1(Ref)            |        |                      |        |                                          |        |
| aspirin monotherapy | 1.50 (0.08-29.37) | 0.7887 | Non-estimable        |        | Non-estimable                            |        |
| clopidogrel-aspirin | 2.35 (0.12-44.30) | 0.5680 | Non-estimable        |        | Non-estimable                            |        |

adjusted variables: age; male sex; initial NIHSS score; arrival time; TOAST classification; history of TIA, stroke, CAD, PAD; HTN; DM; dyslipidemia; smoking; atrial fibrillation; prior antiplatelet, antihypertensive, antidiabetic, statin, or lipid-lowering agent use; multiple lesions; LASO; discharge medications of antihypertensives, antidiabetics, statins, and lipid-lowering agents; creatinine; hemoglobin; platelet count; LDL-C; glucose; and SBP.

<sup>a</sup> Cox PH regression using Firth's penalized maximum likelihood method.

<sup>b</sup> Weighted Cox proportional hazards model with robust standard errors.
